# Supplementary material
Source: HighWire-hosted journal article supplement (https://bmjopen.bmj.com/content/10/4/e035940)
Supplement: inline-supplementary-material-2 [file inline-supplementary-material-2.pdf]

Palmer Systematic Review Search Strategy  
PubMed  
October 2019

### **African American or African Ancestry**

african american OR Black American OR African ancestry OR african continental ancestry group[MH]

### **Hair Salons / Barbershops**

(barber NOT barber[au]) OR beautician OR hairdresser OR hairstylist OR beauty salon OR hair salon OR salon OR salons OR stylist OR stylists OR "Barbering"[Mesh] OR "hair"[mesh] OR "beauty culture"[mesh] OR "beauty shop"

### **Combination**

(african american OR Black American OR African ancestry OR african continental ancestry group[MH]) AND ((barber NOT barber[au]) OR beautician OR hairdresser OR hairstylist OR beauty salon OR hair salon OR salon OR salons OR stylist OR stylists OR "Barbering"[Mesh] OR "hair"[mesh] OR "beauty culture"[mesh] OR "beauty shop")
